# Supplementary material
Source: Springer Nature journal article supplement (https://www.springermedizin.de/resource/supplementary/13023_2012_508_MOESM7_ESM.pdf/9642730)

A

## Cleaved Caspase-3

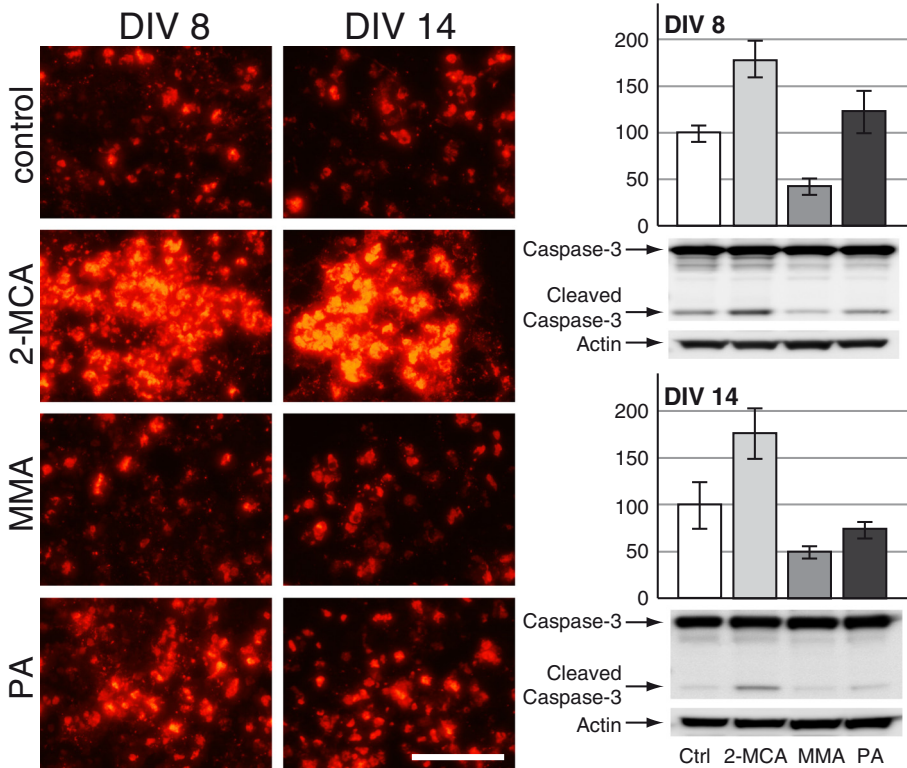

B

## Lactate Dehydrogenase

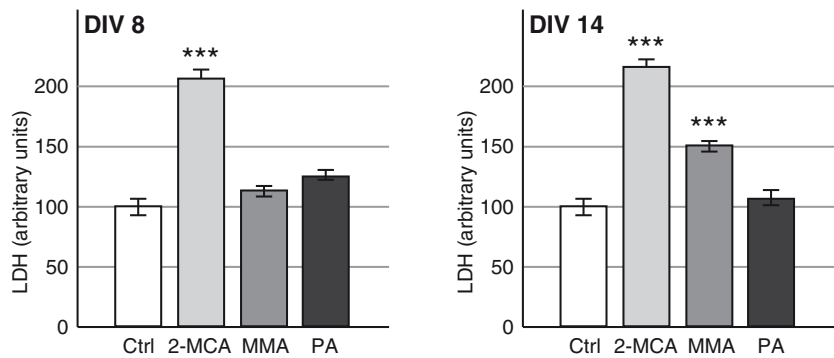

Supplement: MOESM7 [file 9642730]
